# Supplementary material for: Immunostimulatory Activity of Synbiotics Using Lactococcus lactis SG-030 and Glucooligosaccharides from Weissella cibaria YRK005
Source: MDPI journal article supplement (doi:10.3390/microorganisms9122437), 2021-11-25
Supplement: s1 [file s1]

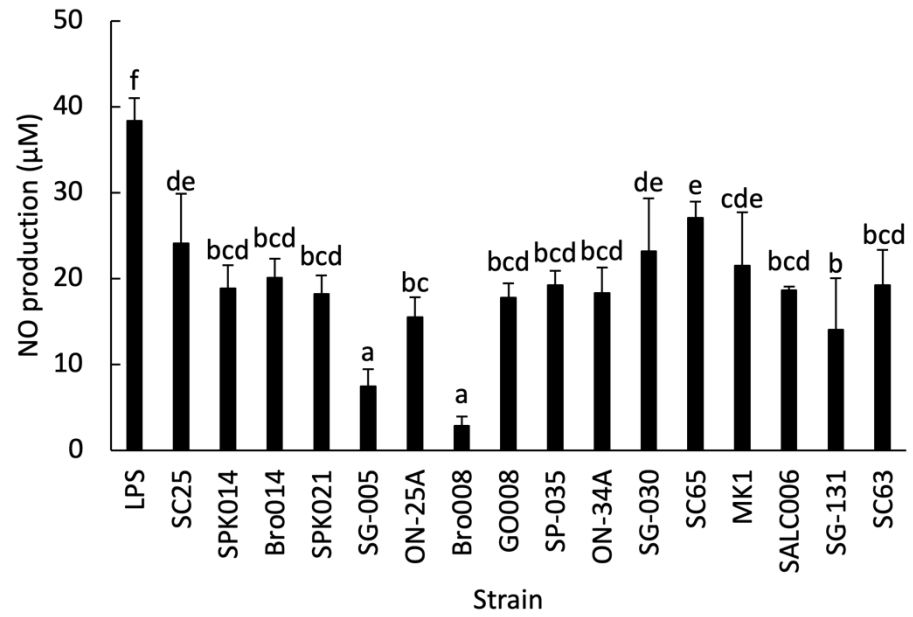

**Figure S1.** Effect of lactic acid bacteria on nitric oxide production in RAW 264.7 macrophages. The multiplicity of infection (bacterial cells number/macrophage cells number) was 500. Data are expressed as means  $\pm$  standard deviation of three independent experiments. LPS, RAW 264.7 cells were treated with 1  $\mu$ g/mL lipopolysaccharides for 24 h.

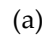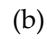

**Figure S2.** Scanning electron microscopic image and phylogenetic tree of *L. lactis* SG-030. (a) Scanning electron microscopic image of *L. lactis* SG-030 ( $\times 40,000$ ). (b) Phylogenetic tree of *L. lactis* SG-030 generated by neighbor-joining method based on the sequence of 16S rRNA gene.

**Table S1.** Sequence of primers for real-time PCR.

| Gene          |         | Sequence                                  |
|---------------|---------|-------------------------------------------|
| GAPDH         | Forward | 5'—ATC CCA TCA CCA TCT TCC AG—3'          |
|               | Reverse | 5'—CCT GCT TCA CCA CCT TCT TG—3'          |
| TNF- $\alpha$ | Forward | 5'—ATG AGC ACA GAA AGC ATG ATC CG—3'      |
|               | Reverse | 5'—CCA AAG TAG ACC TGC CCG GAC TC—3'      |
| IL-1 $\beta$  | Forward | 5'—ATG GCA ACT GTT CCT GAA CTC AAC T—3'   |
|               | Reverse | 5'—CAG GAC AGG TAT AGA TTC TTT CCT T—3'   |
| IL-6          | Forward | 5'—CAA GAG ACT TCC ATC CAG TTG C—3'       |
|               | Reverse | 5'—TTG CCG AGT TCT CAA AGT GAC—3'         |
| iNOS          | Forward | 5'—AAT GGC AAC ATC AGG TCG GCC ATC ACT—3' |
|               | Reverse | 5'—GCT GTG TGT CAC AGA AGT CTC GAA CTC—3' |

**Table S2.** Condition of real-time PCR.

| Temperature (°C) | Time (s) | Cycle |
|------------------|----------|-------|
| 95               | 600      | 1     |
| 95               | 10       | 45    |
| 55               | 30       |       |
| 72               | 15       |       |
| 95               | 10       | 1     |
| 65               | 60       |       |
| 97               | 1        |       |

**Table S3.** Probiotic properties of lactic acid bacteria isolated in our laboratory.

| Strain  | Isolation source                       | Antioxidant activity (%) | Acid tolerance (%) | Bile tolerance (%) | Adhesion ability (%) |
|---------|----------------------------------------|--------------------------|--------------------|--------------------|----------------------|
| BKKC329 | Kimchi                                 | 55.6 ± 9.3               | 20.6 ± 2.9         | 87.1 ± 0.6         | n.d.                 |
| BKKC339 | Kimchi                                 | 41.4 ± 3.4               | 20.8 ± 1.4         | 86.4 ± 0.2         | n.d.                 |
| Bro008  | Broccoli                               | 53.9 ± 4.3               | 39.7 ± 1.9         | 98 ± 0.5           | 53.3 ± 3.7           |
| Bro014  | Broccoli                               | 71.9 ± 0.7               | 14.9 ± 2.1         | 86.4 ± 1.1         | 46.7 ± 7.7           |
| GO008   | Green onion                            | 57.0 ± 7.4               | 54.2 ± 1.3         | 79.2 ± 0.4         | 70.5 ± 10.2          |
| HW1-1   | Green onion                            | 28.2 ± 8.0               | n.d.               | 90.5 ± 2.4         | N.D.                 |
| MK1     | Kimchi                                 | 64.2 ± 2.5               | 57.7 ± 7.4         | 83.0 ± 1.9         | 72.2 ± 10.7          |
| ON-25A  | Onion                                  | 48.3 ± 8.1               | 49.2 ± 4.1         | 81.6 ± 0.8         | 61.6 ± 4.7           |
| ON-34A  | Onion                                  | 47.8 ± 4.0               | 60.4 ± 0.0         | 81.8 ± 1.4         | 61.4 ± 4.4           |
| PEAR008 | Pear                                   | 57.8 ± 9.0               | n.d.               | 57.9 ± 3.1         | N.D.                 |
| SALC006 | Salted clam                            | 51.8 ± 1.7               | 24.4 ± 5.0         | 83.6 ± 0.5         | 55.8 ± 11.0          |
| SC10    | Salted small octopus                   | 58.8 ± 2.6               | n.d.               | 84.7 ± 2.6         | N.D.                 |
| SC21    | Salted small octopus                   | 55.6 ± 5.7               | n.d.               | 83.6 ± 2.4         | N.D.                 |
| SC25    | Salted small octopus                   | 72.1 ± 5.1               | 11.8 ± 1.6         | 89.6 ± 1.6         | 66.7 ± 7.4           |
| SC5     | Salted small octopus                   | 46.9 ± 5.0               | n.d.               | 86.2 ± 2.5         | N.D.                 |
| SC63    | Pickled burdock                        | 68.5 ± 2.4               | 59.4 ± 1.0         | 82.8 ± 3.1         | 75.0 ± 2.6           |
| SC65    | Pickled burdock                        | 67.7 ± 2.5               | 59.8 ± 4.1         | 90.6 ± 2.4         | 70.6 ± 11.2          |
| SG-001  | Leek                                   | 36.3 ± 4.0               | 7.8 ± 0.5          | 78.3 ± 1.9         | n.d.                 |
| SG-005  | Potato                                 | 48.6 ± 7.3               | 28.4 ± 6.5         | 72.3 ± 0.1         | 50.2 ± 6.6           |
| SG-010  | Kimchi                                 | 53.1 ± 4.6               | n.d.               | 83.7 ± 3.0         | N.D.                 |
| SG-025  | Flower of Japanese apricot             | 64.3 ± 9.0               | n.d.               | 88.9 ± 0.2         | N.D.                 |
| SG-030  | <i>Forsythia koreana</i> (Rehd.) Nakai | 70.0 ± 5.2               | 59.1 ± 8.6         | 77.9 ± 0.5         | 80.4 ± 5.3           |
| SG-131  | Chinese cabbage kimchi                 | 65.2 ± 8.9               | n.d.               | 84.1 ± 0.0         | N.D.                 |
| SG-138  | Chinese cabbage kimchi                 | 49.3 ± 3.7               | 16.3 ± 6.4         | 70.5 ± 1.7         | 61.1 ± 5.3           |
| SG-147  | Young radish kimchi                    | 56.7 ± 6.2               | n.d.               | 89.7 ± 0.2         | N.D.                 |
| SG-303  | Young radish kimchi                    | 58.6 ± 8.5               | n.d.               | 87.0 ± 0.7         | N.D.                 |
| SG-309  | Chinese cabbage kimchi                 | 56.5 ± 9.1               | n.d.               | 99.0 ± 6.6         | N.D.                 |
| SG-312  | Chinese cabbage kimchi                 | 56.4 ± 1.6               | 14.8 ± 5.5         | 87.8 ± 0.1         | n.d.                 |
| SP-035  | Sweet potato                           | 9.12 ± 4.9               | 57.6 ± 3.3         | 81.6 ± 0.8         | 70.6 ± 10.4          |
| SPK014  | Sweet pumpkin                          | 62.7 ± 8.6               | 40.9 ± 3.2         | 90.1 ± 0.6         | 54.0 ± 4.3           |
| SPK021  | Sweet pumpkin                          | 54.7 ± 5.2               | 58.8 ± 8.9         | 82.4 ± 1.2         | 82.0 ± 10.5          |
| YKC006  | Kimchi                                 | 43.8 ± 2.0               | n.d.               | 64.5 ± 6.1         | N.D.                 |

n.d., not detected; N.D., not determined. Data are expressed as means ± standard deviation of three independent experiments.

**Table S4.** Carbohydrate utilization of *L. lactis* SG-030 analyzed by API CHL 50 kit.

| Carbohydrate                             | <i>L. lactis</i><br>SG-030 | <i>L. lactis</i><br>KCCM<br>40104 | Carbohydrate                   | <i>L. lactis</i><br>SG-030 | <i>L. lactis</i><br>KCCM<br>40104 |
|------------------------------------------|----------------------------|-----------------------------------|--------------------------------|----------------------------|-----------------------------------|
| Glycerol                                 | -                          | -                                 | Salicin                        | +                          | +                                 |
| Erythritol                               | -                          | -                                 | D-Cellobiose                   | +                          | +                                 |
| D-Arabinose                              | -                          | -                                 | D-Maltose                      | +                          | +                                 |
| L-Arabinose                              | -                          | -                                 | D-Lactose (bovine<br>origin)   | +                          | -                                 |
| D-Ribose                                 | +                          | +                                 | D-Melibiose                    | -                          | -                                 |
| D-Xylose                                 | -                          | -                                 | D-Saccharose (sucrose)         | +                          | +                                 |
| L-Xylose                                 | -                          | -                                 | D-Trehalose                    | -                          | +                                 |
| D-Adonitol                               | -                          | -                                 | Inulin                         | -                          | -                                 |
| Methyl- $\beta$ -D-Xylopyra-<br>noside   | -                          | -                                 | D-Melezitose                   | -                          | -                                 |
| D-Galactose                              | +                          | +                                 | D-Raffinose                    | -                          | -                                 |
| D-Glucose                                | +                          | +                                 | Amidon (starch)                | +                          | +                                 |
| D-Fructose                               | +                          | +                                 | Glycogen                       | -                          | -                                 |
| D-Mannose                                | +                          | +                                 | Xylitol                        | -                          | -                                 |
| L-sorbose                                | +                          | -                                 | Gentiobiose                    | +                          | +                                 |
| L-Rhamnose                               | -                          | -                                 | D-Turanose                     | -                          | -                                 |
| Ducitol                                  | -                          | -                                 | D-Lyxose                       | -                          | -                                 |
| Inositol                                 | -                          | -                                 | D-Tagatose                     | -                          | -                                 |
| D-Mannitol                               | -                          | -                                 | D-Fucose                       | -                          | -                                 |
| D-Sorbitol                               | -                          | -                                 | L-Fucose                       | -                          | -                                 |
| Methyl- $\alpha$ -D-Mannopy-<br>ranoside | -                          | -                                 | D-Arabitol                     | -                          | -                                 |
| Methyl- $\alpha$ -D-Glucopy-<br>ranoside | -                          | -                                 | L-Arabitol                     | -                          | -                                 |
| N-Acetyl Glucosamine                     | +                          | +                                 | Potassium gluconate            | -                          | -                                 |
| Amygdalin                                | +                          | +                                 | Potassium 2-ketoglu-<br>conate | -                          | -                                 |
| Arbutin                                  | +                          | +                                 | Potassium 5-ketoglu-<br>conate | -                          | -                                 |
| Esculin ferric citrate                   | +                          | +                                 |                                |                            |                                   |

*L. Lactis* KCCM 40104 was used as reference strain.
